# Supplementary material
Source: Springer Nature journal article supplement (https://www.springermedizin.de/resource/supplementary/12985_2014_2417_MOESM4_ESM.pdf/9607054)

**A**

A549 cells

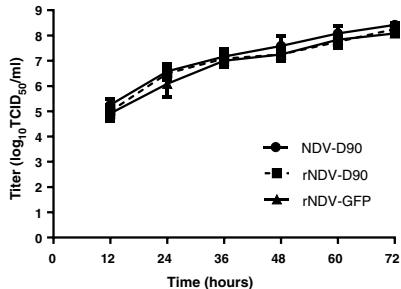**C**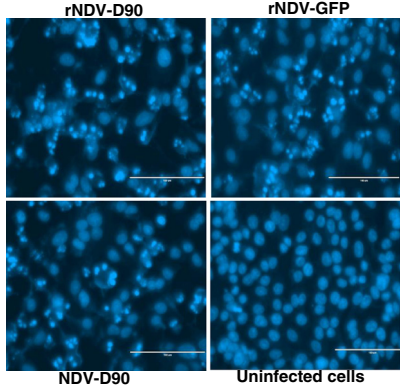**B**

A549 cells

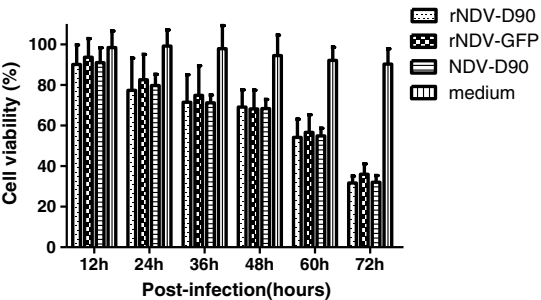

Supplement: MOESM4 [file 9607054]
